# Supplementary material
Source: Springer Nature journal article supplement (https://www.springermedizin.de/resource/supplementary/13256_2011_1932_MOESM2_ESM.pdf/9648750)
Supplement: MOESM2 [file 9648750]

**Table 1: Assessments at various time points through the 12mth follow-up period**

| <b>Scales<br/>Score range</b> | <b>0 wk</b>                              | <b>8<sup>th</sup> wk</b>                 | <b>12<sup>th</sup> wk</b>                | <b>13<sup>th</sup> wk</b>         | <b>24<sup>th</sup> wk<br/>(6<sup>th</sup> mth)</b> | <b>48<sup>th</sup> wk (12<sup>th</sup><br/>mth)</b> |
|-------------------------------|------------------------------------------|------------------------------------------|------------------------------------------|-----------------------------------|----------------------------------------------------|-----------------------------------------------------|
| <b>CGI-S</b><br>(1-7)         | 4<br>(moderate)                          | 4                                        | 4                                        | 2<br>(borderline<br>mentally ill) | 2                                                  | 2                                                   |
| <b>CGI-I</b><br>(1-7)         | NA                                       | 4<br>(no change)                         | 3<br>(mild<br>improvement)               | 2<br>(much<br>improvement)        | 2                                                  | 1<br>(very much<br>improved)                        |
| <b>MGHPS</b><br>(0-28)        | 21(moderate)                             | 20(moderate)                             | 18(moderate)                             | 10(mild)                          | 9(mild)                                            | 9(mild)                                             |
| <b>NIMH-TSS</b><br>(0-30)     | 23(moderate)                             | 22(moderate)                             | 19(moderate)                             | 12(mild)                          | 10(mild)                                           | 8(mild)                                             |
| <b>NIMH-TIS</b><br>(0-10)     | 8<br>(moderate-<br>severe<br>impairment) | 8<br>(moderate-<br>severe<br>impairment) | 7<br>(moderate-<br>severe<br>impairment) | 3<br>(minimal<br>impairment)      | 2<br>(minimal<br>impairment)                       | 1<br>(minimal<br>impairment)                        |
| <b>HADS-D</b><br>(0-21)       | 5<br>(normal)                            | -                                        | -                                        | -                                 | -                                                  | 3<br>(normal)                                       |
